# Supplementary material for: Scalable thermal synthesis of a highly crumpled, highly exfoliated and N-doped graphene/Mn-oxide nanoparticle hybrid for high-performance supercapacitors
Source: Royal Society of Chemistry journal article supplement (doi:10.1039/c5ra04163e), 2015-01-01
Supplement: c5ra04163e1.pdf [file c5ra04163e1.pdf]

## Supporting Information

# Scalable Thermal Synthesis of Highly Crumpled, Highly Exfoliated and N-doped Graphene/Mn-Oxide Nanoparticle Hybrid for High-Performance Supercapacitors

*Jun-Bo Sim<sup>a</sup>, Sundar Mayavana<sup>a,b</sup> and Sung-Min Choi<sup>a\*</sup>*

<sup>a</sup> Department of Nuclear and Quantum Engineering, Korea Advanced Institute of Science and  
Technology (KAIST), Daejeon 305-701, Republic of Korea

<sup>b</sup> Division of Corrosion & Materials Protection, Central Electrochemical Research  
Institute, Karaikudi-630006, Tamil Nadu, India.

E-mail: [sungmin@kaist.ac.kr](mailto:sungmin@kaist.ac.kr)

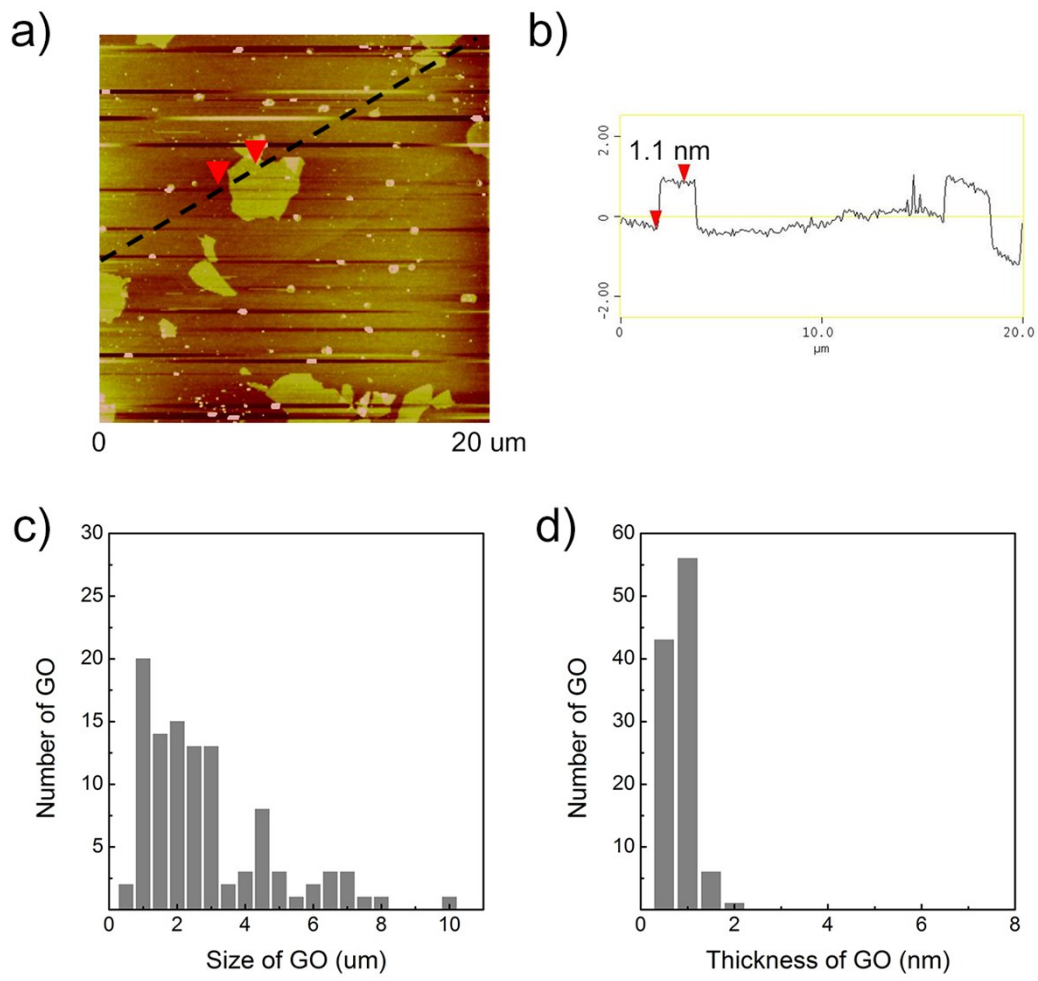

Figure S1. (a) AFM image, (b) cross section, (c) size distribution and (d) thickness distribution of GO.

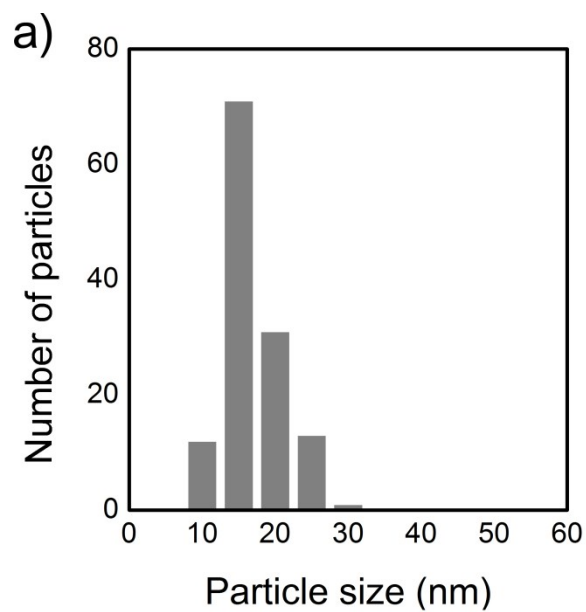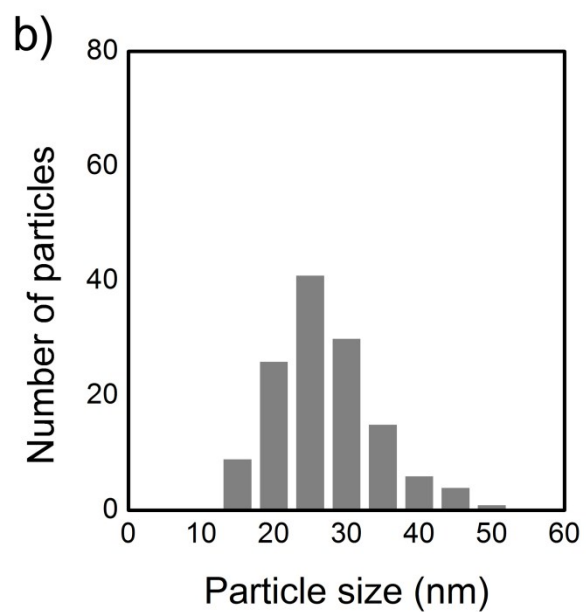

Figure S2. Size distribution of Mn-oxide nanoparticles in  $\text{Mn}(\text{NO}_3)_2 \cdot 4\text{H}_2\text{O}$  mixtures a) annealed at 500 °C and b) annealed at 500 °C followed by a rapid quenching.

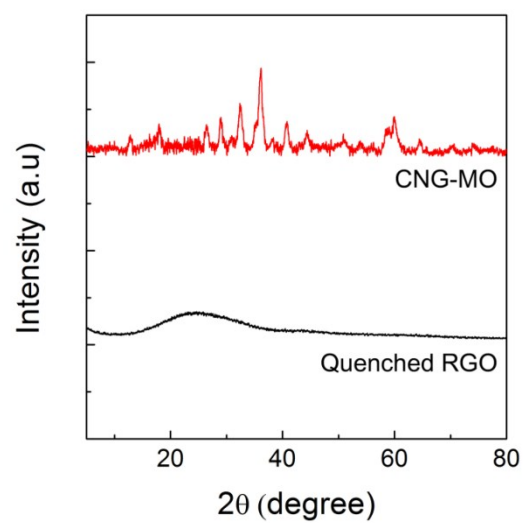

Figure S3. XRD patterns of GO-Gly-Mn(NO<sub>3</sub>)<sub>2</sub>·4H<sub>2</sub>O mixtures annealed at 500 °C followed by a rapid quenching, and quenched RGO.

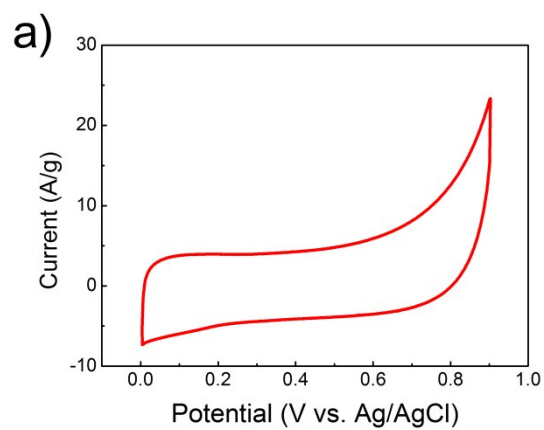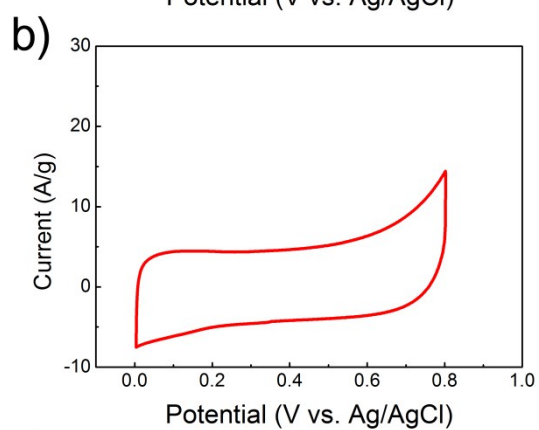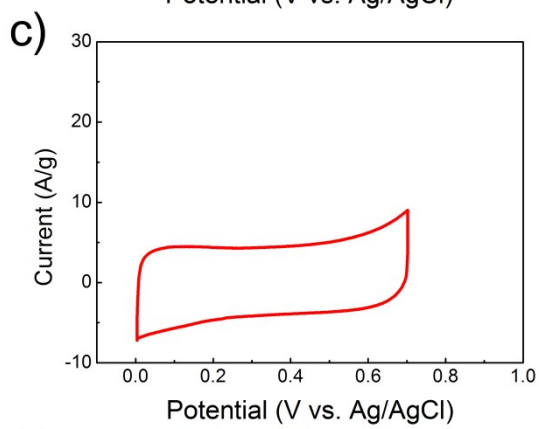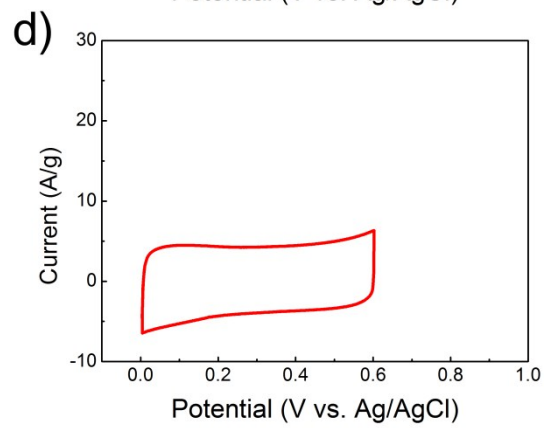

Figure S4. CV curves of the CNG-MO sample measured with different upper cut-off voltages at a scan rate of 5 mV/sec. a) 0.9, b) 0.8, c) 0.7, and d) 0.6 V vs. Ag/AgCl.

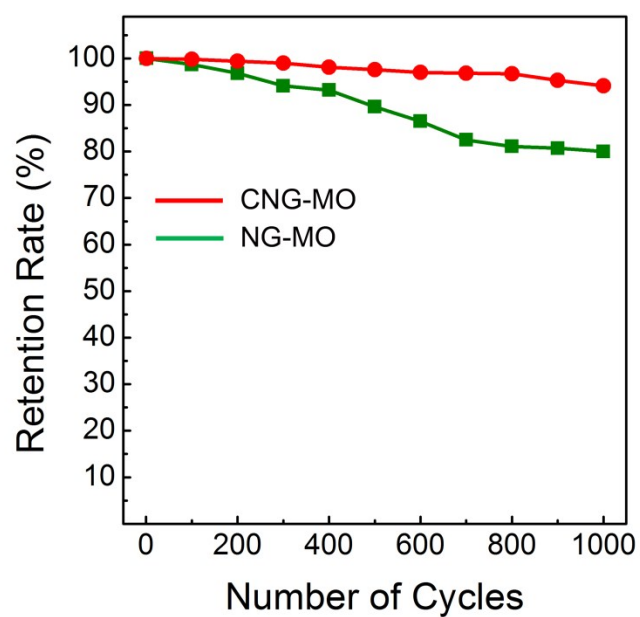

Figure S5. Cycle stabilities of the CNG-MO and NG-MO at a scan rate of 5 mV/sec.
